# Supplementary material
Source: PubMed Central journal article supplement (PMC2663753)
Supplement: pp.108.133744_4.pdf [file pp.108.133744_4.pdf]

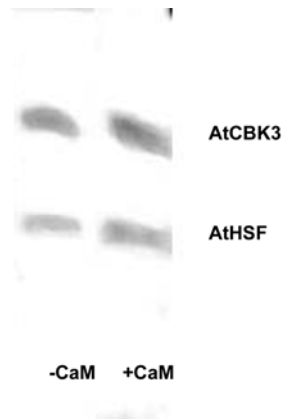

**Figure S2.** The activation of additive CaM on activity of AtCBK3.

Recombinant protein of AtCaM2 isoform expressed in E coli was obtained and purified. 0.5  $\mu\text{g}$  of CaM was added in this experiment (Adapted, with permission, from Liu et al., 2008, *Plant J*, **5**: 760-773).
